# Supplementary material
Source: publisher figshare collection journal article supplement (https://karger.figshare.com/articles/dataset/_/12859577)
Supplement: Supplementary file 1 [file 1]

Predicted trends of physiological data from mixed-effects models

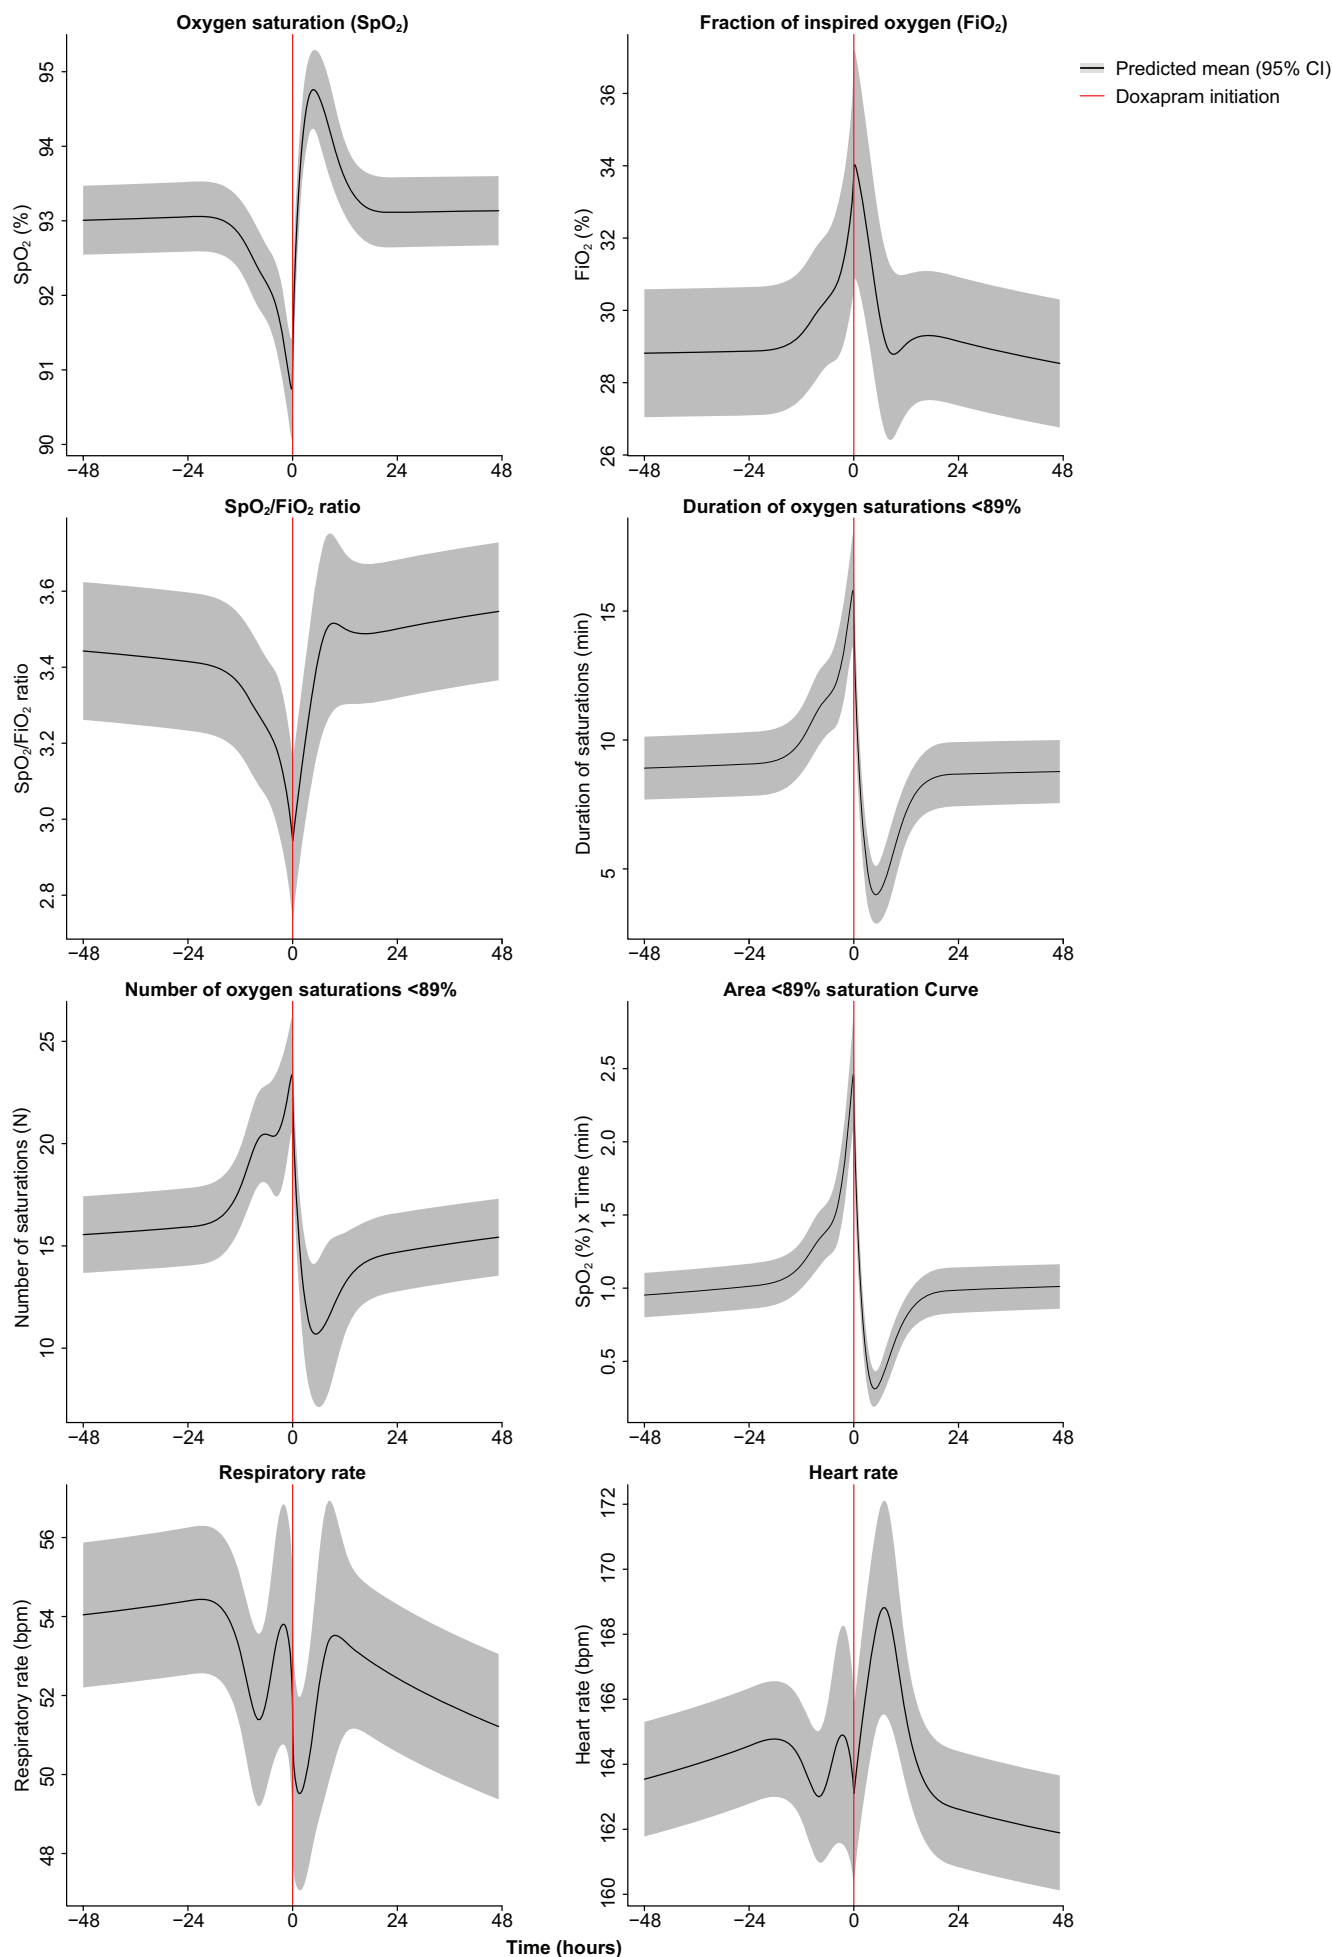

**Fig. S1.** The predicted mean trend with 95% CI of the physiological parameters from the linear mixed models. The models allowed for a nonlinear effect of time in the fixed-effects part, with natural splines concentrated around doxapram therapy start. The random-effect part included random intercepts and splines. The R squared values, as goodness-of-fit measure, were 0.37, 0.66, 0.72, 0.31, 0.33, 0.26, 0.32, 0.49 for the oxygen saturation ( $SpO_2$ ), fraction of inspired oxygen ( $FiO_2$ ),  $SpO_2/FiO_2$  ratio, duration of episodes with saturation below target, number of episodes with saturations below target, area under the curve below the  $SpO_2$  limit of 89%, respiratory rate and heart rate, respectively.
