# Supplementary material
Source: publisher figshare collection journal article supplement (https://karger.figshare.com/articles/dataset/_/12859577)
Supplement: Supplementary file 2 [file 1]

# Differences in the physiological data before and after doxapram start

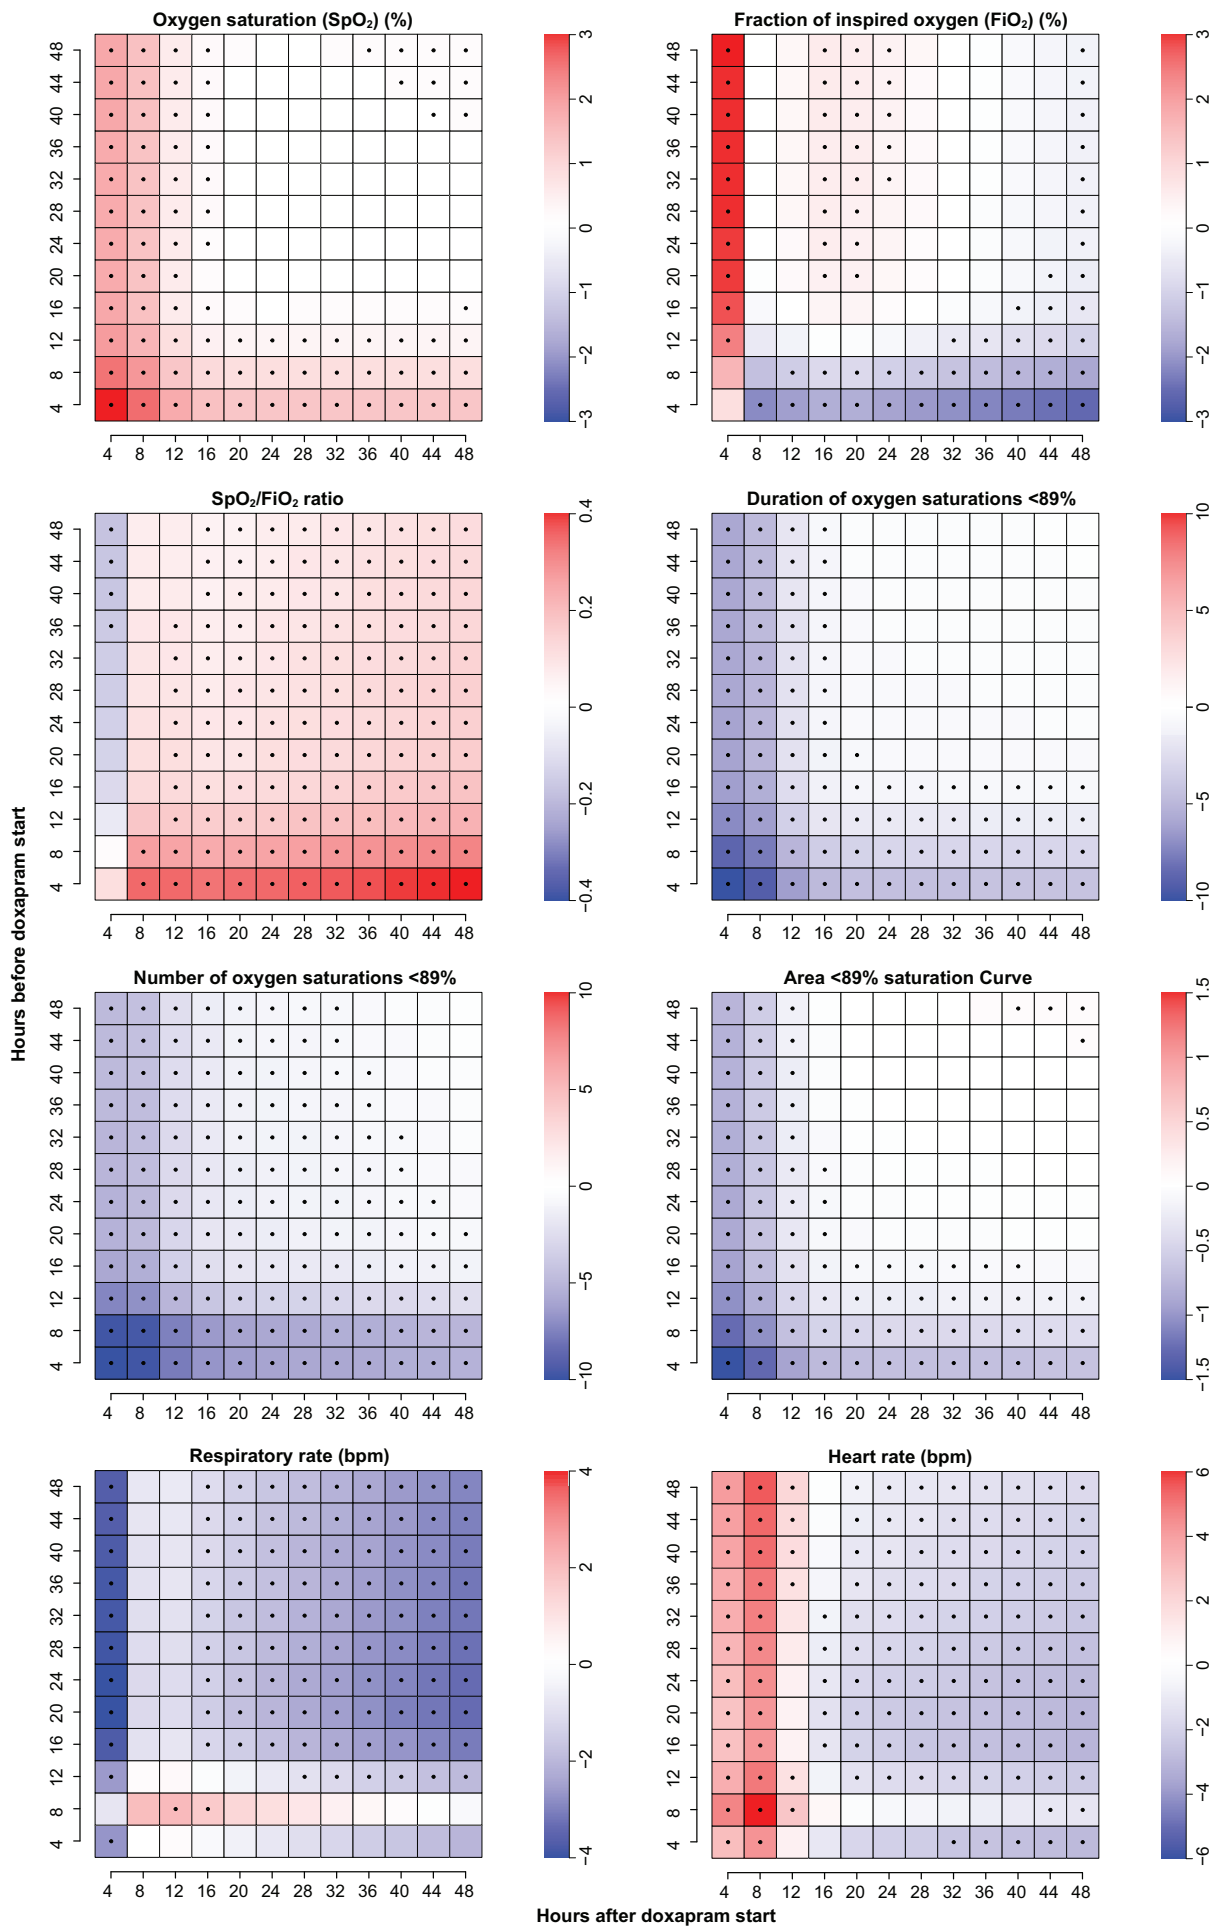

**Fig. S2.** The plots visualize the degree of change in the physiological parameters before and after doxapram start per 4-hour timeframe. The 48 hours before doxapram start are presented on the y-axis, and the 48 hours after therapy start is presented on the x-axis. Each 4 hours the difference before and after is tested. The dots indicate a significant difference. The colours show an increasing difference from non-intensive to intensive. The oxygen saturation, for example, was significantly increased with approximately 3% in the first 4 hours after therapy start, compared to the 4 hours before therapy start. In the next hours after doxapram start the mean oxygen saturation remained significantly increased when compared to the 4 hours before therapy start, although the increase is slightly smaller than in the first 4 hours after start. After 24 hours of doxapram therapy, the mean oxygen saturation shows almost no difference when compared to the oxygen saturation at 24 hours before therapy start.
